# Supplementary material for: Paper-based fluorogenic RNA aptamer sensors for label-free detection of small molecules
Source: Royal Society of Chemistry journal article supplement (doi:10.1039/d0ay00588f), 2020-01-01
Supplement: d0ay00588f1.pdf [file d0ay00588f1.pdf]

## SUPPORTING INFORMATION

### **Paper-based Fluorogenic RNA Aptamer Sensors for Label-Free Detection of Small Molecules**

Fatemeh Shafiei,<sup>a</sup> Kathleen McAuliffe,<sup>a</sup> Yousef Bagheri,<sup>a</sup> Zhining Sun,<sup>a</sup> Qikun Yu,<sup>a</sup> Rigumula Wu,<sup>\*a</sup> and Mingxu You<sup>\*a</sup>

<sup>a</sup> Department of Chemistry, University of Massachusetts, Amherst, Massachusetts 01003, USA

\* Correspondence authors

E-mail: [rigumulawu@umass.edu](mailto:rigumulawu@umass.edu); [mingxuyou@umass.edu](mailto:mingxuyou@umass.edu)

**Table S1.** RNA sequences used in this project. The Broccoli sequences were shown in green. The F30 scaffold sequences were shown in purple. Target-binding aptamers were shown in black. The transducer sequences were underlined.

|                              |                                                                                                                                                                                                     |
|------------------------------|-----------------------------------------------------------------------------------------------------------------------------------------------------------------------------------------------------|
| Broccoli                     | GAGACGGUCGGGUCCAGAUAUUCGUAUCUGUCGAGUAGAGUGUGGGCUC                                                                                                                                                   |
| F30-Broccoli                 | GGAAGUUGCCAUGUGUAUCGGUCCGAUACUCUGAUGAUCCGAGACGGUC<br>GGGUCCAGAUAUUCGUAUCUGUCGAGUAGAGUGUGGGCUCGGAUCAUUC<br>AUGGCAA                                                                                   |
| Broccoli tetracycline sensor | UUGCCAUGUGUAUGUGGGGAGACGGUCGGGUCCAGAU <u>UGGAAA</u> ACAUACCAGAU<br>UUCGAUCUGGAGAGGUGAAGAAUACGACCACCU <u>UCCA</u> CUGUCGAGUAGAGUG<br>UGGGCUC <u>CCACA</u> UACUCUGAUGAUCCUUCGGGAUCAU <u>UCAUGGCAA</u> |

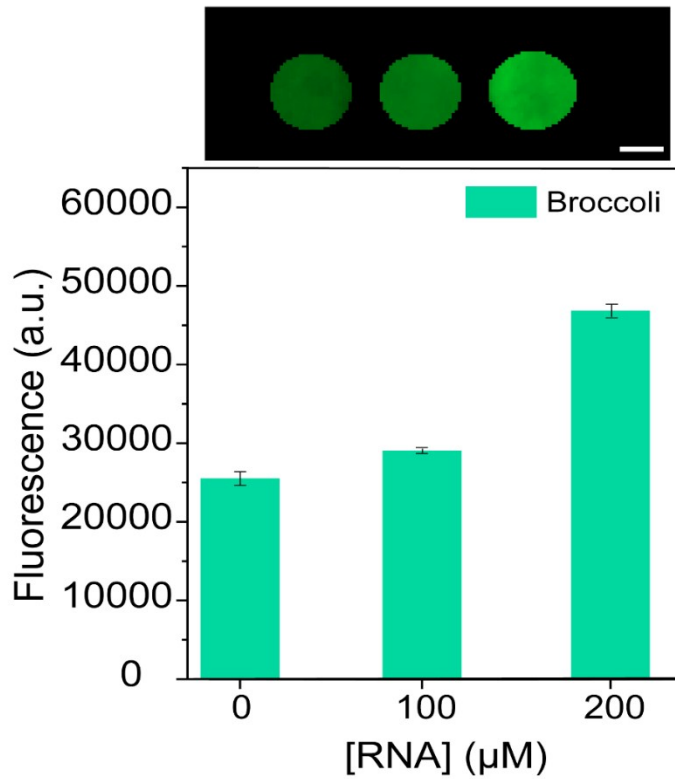

**Figure S1.** Using a small size paper pallet, 0.1 pmol of Broccoli RNA can be detected. Scale bar, 0.8 mm. Shown are mean and SD values of three independent replicates.

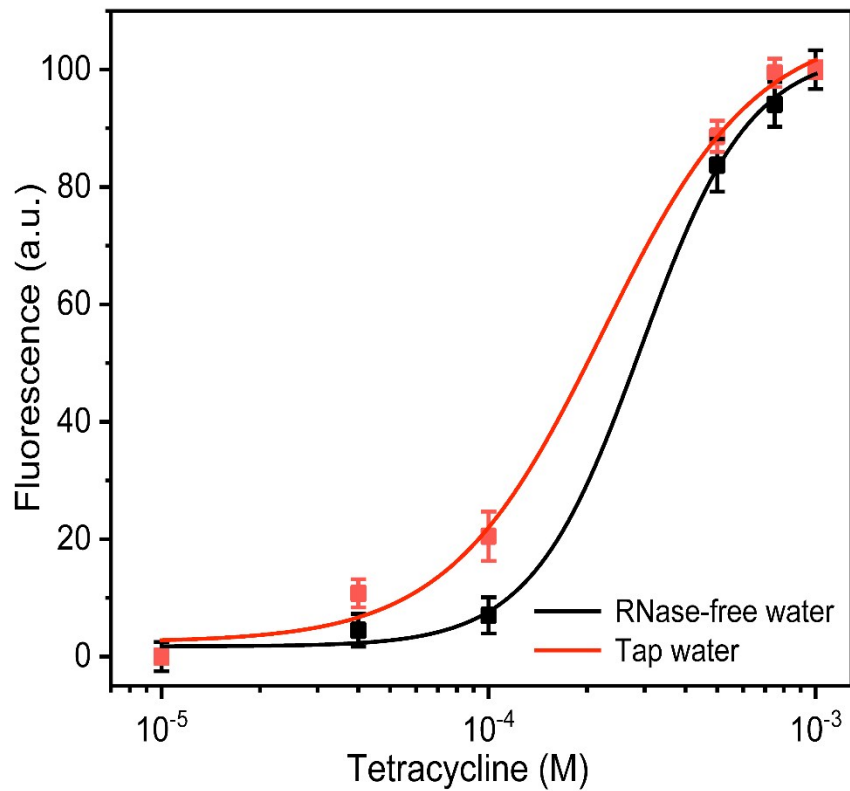

**Figure S2.** Dose-response curve for the fluorescence detection of tetracycline in RNase-free buffer and tap water sample. Fluorescence signal at each tetracycline concentration was measured after 30 min incubation. Shown are mean and SD values of three independent replicates.
